# Supplementary material for: Targeting SNORA38B attenuates tumorigenesis and sensitizes immune checkpoint blockade in non-small cell lung cancer by remodeling the tumor microenvironment via regulation of GAB2/AKT/mTOR signaling pathway
Source: HighWire-hosted journal article supplement (doi:10.1136/jitc-2021-004113), 2022-05-01
Supplement: jitc-2021-004113supp001_data_supplement.xlsx [file jitc-2021-004113supp001_data_supplement.xlsx]

## Sheet: Sheet1
Supplementary Table 1. BC04119b : Lung adenocarcinoma tissue array with normal lung tissue (2015 WHO classification), including pathology grade, TNM and clinical stage,30 cases/40 cores, replacing BC04119a
Pos.	No.	Age	Sex	Organ/Anatomic Site	Pathology diagnosis	TNM	Grade	Stage	Type
A1	1	66	M	Lung	Papillary adenocarcinoma	T2N0M0	1	I	Malignant
A2	2	61	M	Lung	Papillary adenocarcinoma	T2N1M0	1	II	Malignant
A3	3	50	M	Lung	Acinar adenocarcinoma	T1N0M0	1	I	Malignant
A4	4	55	M	Lung	Acinar adenocarcinoma	T2N0M0	1	I	Malignant
A5	5	65	M	Lung	Acinar adenocarcinoma	T2N0M0	1	I	Malignant
A6	6	42	F	Lung	Acinar adenocarcinoma	T3N1M0	1	IIIA	Malignant
A7	7	62	M	Lung	Papillary adenocarcinoma	T2N0M0	1	I	Malignant
A8	8	60	M	Lung	Papillary adenocarcinoma	T2N0M0	1	I	Malignant
A9	9	70	M	Lung	Acinar adenocarcinoma	T2N0M0	1	I	Malignant
A10	10	70	M	Lung	Acinar adenocarcinoma	T1N0M0	1	I	Malignant
B1	11	70	M	Lung	Papillary adenocarcinoma	T1N0M0	1	I	Malignant
B2	12	60	F	Lung	Papillary adenocarcinoma	T2N0M0	1	I	Malignant
B3	13	67	M	Lung	Acinar adenocarcinoma	T2N0M0	2--3	I	Malignant
B4	14	58	M	Lung	Acinar adenocarcinoma	T2N1M0	2--3	II	Malignant
B5	15	47	M	Lung	Acinar adenocarcinoma	T1N0M0	2--3	I	Malignant
B6	16	51	M	Lung	Acinar adenocarcinoma	T2N0M0	2--3	I	Malignant
B7	17	37	F	Lung	Acinar adenocarcinoma	T2N0M0	2--3	I	Malignant
B8	18	61	M	Lung	Acinar adenocarcinoma	T1N0M0	2--3	I	Malignant
B9	19	59	M	Lung	Solid adenocarcinoma	T2N1M0	3	II	Malignant
B10	20	50	F	Lung	Solid adenocarcinoma	T3N0M0	3	IIB	Malignant
C1	21	18	F	Lung	Lung tissue	-	-	-	Normal
C2	22	18	F	Lung	Lung tissue	-	-	-	Normal
C3	23	49	M	Lung	Lung tissue	-	-	-	Normal
C4	24	49	M	Lung	Lung tissue	-	-	-	Normal
C5	25	48	M	Lung	Lung tissue	-	-	-	Normal
C6	26	48	M	Lung	Lung tissue	-	-	-	Normal
C7	27	24	M	Lung	Lung tissue	-	-	-	Normal
C8	28	24	M	Lung	Lung tissue	-	-	-	Normal
C9	29	22	M	Lung	Lung tissue	-	-	-	Normal
C10	30	22	M	Lung	Lung tissue	-	-	-	Normal
D1	31	35	M	Lung	Lung tissue	-	-	-	Normal
D2	32	35	M	Lung	Lung tissue	-	-	-	Normal
D3	33	47	M	Lung	Lung tissue	-	-	-	Normal
D4	34	47	M	Lung	Lung tissue	-	-	-	Normal
D5	35	15	F	Lung	Lung tissue	-	-	-	Normal
D6	36	15	F	Lung	Lung tissue	-	-	-	Normal
D7	37	42	M	Lung	Lung tissue	-	-	-	Normal
D8	38	42	M	Lung	Lung tissue	-	-	-	Normal
D9	39	47	M	Lung	Lung tissue	-	-	-	Normal
D10	40	47	M	Lung	Lung tissue	-	-	-	Normal
-	0	55	F	liver	Hepatocellular liver cancer (tissue marker)	T3N0M0	3		Malignant
NOTE: The American Joint Committee on Cancer (AJCC) TNM system T groups TX: Primary tumor cannot be assessed T0: No evidence of primary tumor T1: A single tumor (any size) that hasn't grown into blood vessels T2: Either a single tumor (any size) that has grown into blood vessels, OR more than one tumor where no tumor is larger than 5 cm (about 2 inches) across T3a: Multiple tumors with at least o…
