# Supplementary material for: Targeting SNORA38B attenuates tumorigenesis and sensitizes immune checkpoint blockade in non-small cell lung cancer by remodeling the tumor microenvironment via regulation of GAB2/AKT/mTOR signaling pathway
Source: HighWire-hosted journal article supplement (doi:10.1136/jitc-2021-004113), 2022-05-01
Supplement: jitc-2021-004113supp002_data_supplement.xlsx [file jitc-2021-004113supp002_data_supplement.xlsx]

## Sheet: Antibody
Supplemental Table 2: List of antibodies used in this study.
Primary Antibodies	Company	Catalogue Number	Clone	Dilution	Application	Concentration
mTOR	Cell Signaling Technology	2983	7C10	IB, 1:100	IB, IHC, IF, F	94 µg/ml
Phospho-mTOR (Ser2448)	Cell Signaling Technology	5536	D9C2	IB, 1:1000	IB, IP, IF	430 µg/ml
ULK1	Cell Signaling Technology	8054	D8H5	IB, 1:1000	IB, IP	313 µg/ml
β-Actin	Cell Signaling Technology	3700s	8H10D10	IB, 1:1000	IB, IHC, IF, FC	624 µg/ml
Phospho-ULK1 (Ser757)	Cell Signaling Technology	14202	D7O6U	IB, 1:1000	IB, IHC, IF, F	295 µg/ml
His-Tag	Cell Signaling Technology	12698	D3I1O	IB, 1:2000	IB	111 µg/ml
Normal Rabbit IgG	Cell Signaling Technology	2729S	monoclonal	IP, 1:100, ChIP, 1:100	IP, ChIP	1 mg/ml
Normal Mouse IgG	Sigma-Aldrich	12-371	monoclonal	IP,1:100, ChIP, 1:100	IB, IP	1 mg/ml
p70 S6 Kinase	Cell Signaling Technology	14814S	49D7	IB, 1:1000	IB, IHC	17 µg/ml
p70 S6K (phospho Thr421/Ser424)	GeneTex	GTX635621	HL129	IB, 1:1000	IB	1 mg/ml
Phospho-p70 S6 Kinase (Thr389)	Santa Cruz Biotechnology	9234	108D2	IB, 1:1000	IB	0.97 g/ml
4E-BP1	Cell Signaling Technology	9644	53H11	IB, 1:1000	IB, IP, IHC, IF, F	169 µg/ml
Phospho-4E-BP1 (Thr37/46)	Cell Signaling Technology	2855	236B4	IB, 1:1000	IB, IHC, IF, F	60 µg/ml
Phospho-4E-BP1 (Ser65)	Cell Signaling Technology	9451		IB, 1:1000	IB,IP	26 µg/ml
eIF4E	Cell Signaling Technology	2067	C46H6	IB, 1:1000	IB, IP, IHC	54 µg/ml
Phospho-eIF4E (Ser209)	Cell Signaling Technology	9741		IB, 1:1000	IB	Lot-specific
Phospho-S6 Ribosomal Protein (Ser240/244)	Cell Signaling Technology	5364	D68F8	IB, 1:1000	IB, F, IHC; IF	75 µg/ml
S6 Ribosomal Protein	Cell Signaling Technology	2317	54D2	IB, 1:1000	IB, F, IHC; IF	4 µg/ml
p53	Cell Signaling Technology	2524	1C12	IB, 1:1000	IB, ChIP, IP, IF, F	313 µg/ml
E2F-1	Cell Signaling Technology	3742		IB, 1:1000	IB, ChIP	48 µg/ml
GAB2	ThermoFisher	PA5-18705		IB, 1:1000	IB	0.5 mg/ml
CD3ε	Cell Signaling Technology	85061S	D7A6E™	IHC, 1:200	IB, IP, IHC	76 µg/ml
CD3ε	Cell Signaling Technology	99940S	D4V8L	IHC, 1:200	IB, IHC	43 µg/ml
CD8a	Cell Signaling Technology	85336S	D8A8Y	IHC, 1:200	IB, IP, IHC, FC	20 µg/ml
CD8a	Cell Signaling Technology	98941S	D4W2Z	IHC, 1:200	IB, IHC	639 µg/ml
CD4	Cell Signaling Technology	25229	D7D2Z	IHC, 1:200	IB, IHC	155 µg/ml
FoxP3	Cell Signaling Technology	12653	D6O8R	IHC, 1:200	IHC, IF, F	200 µg/ml
Akt	Cell Signaling Technology	9272		IB, 1:1000	IB; IF; IP; F	34 µg/ml
Phospho-Akt (Ser473)	Cell Signaling Technology	4060	D9E	IB, 1:1000	IB; IF; IP; F; IHC	91 µg/ml
Phospho-Akt (Thr308)	Cell Signaling Technology	13038	D25E6	IB, 1:1001	IB; IF; IP; F	1226 µg/ml
Secondary Antibodies	Company	Catalogue Number	Dilution	Application	Concentration
Goat anti-Mouse IgG1 Alexa Fluor 488	ThermoFisher	A-21121	1:300	IF	2mg/ml
Goat anti-Mouse IgG1 Alexa Fluor 594	ThermoFisher	A-21125	1:300	IF	2mg/ml
Goat anti-Rabbit IgG Alexa Fluor 488	ThermoFisher	A-11034	1:300	IF	2mg/ml
Goat anti-Rabbit IgG Alexa Fluor Plus 594	ThermoFisher	A32740	1:300	IF	2mg/ml
Goat anti Rabbit IgG (H/L):HRP	Bio-Rad	STAR208P	1:5000	IB	0.8 mg/ml
Goat anti Mouse IgG (H/L):HRP	Bio-Rad	STAR207P	1:5000	IB	0.8 mg/ml
Streptavidin-HRP	Cell Signaling Technology	3999S	1:2000	IB	200 µg/ml
Flow Cytometry Antibodies	Company	Catalogue Number	Clone	Dilution	Application	Concentration
FITC-CD8a	StemCell	60022FI	RPA-T8	FC, 1:100	FC	withheld
FITC-CD3	StemCell	60011FI	UCHT1	FC, 1:100	FC	withheld
PE-CD4	StemCell	OKT4	OKT4	FC, 1:100	FC	withheld
Pacific Blue-FOXP3	BioLegend	206D	206D	FC, 1:100	FC	0.5 mg/ml
APC-CD45	BioLegend	368512	2D1	FC, 1:100	FC	Lot-specific
PE-CD45	BioLegend	368510	2D1	FC, 1:100	FC	Lot-specific
PE-CD45	BioLegend	103106	30-F11	FC, 1:100	FC	0.2 mg/ml
APC-CD45	BioLegend	103112	30-F11	FC, 1:100	FC	0.2 mg/ml
APC/Cyanine7-CD8a	BioLegend	100714	53-6.7	FC, 1:100	FC	0.2 mg/ml
APC/Cyanine7-CD3ε	BioLegend	100330	145-2C11	FC, 1:100	FC	0.2 mg/ml
APC-CD3ε	BioLegend	100312	145-2C11	FC, 1:100	FC	0.2 mg/ml
FITC-CD4	BioLegend	100406	GK1.5	FC, 1:100	FC	0.5 mg/ml
APC-CD4	BioLegend	100412	GK1.5	FC, 1:100	FC	0.2 mg/ml
PE-FOXP3	BioLegend	320008	150D	FC, 1:100	FC	Lot-specific
FITC-FOXP3	Invitrogen	11-5773-82	FJK-16s	FC, 1:100	FC	0.5 mg/mL
