# Supplementary material for: Targeting SNORA38B attenuates tumorigenesis and sensitizes immune checkpoint blockade in non-small cell lung cancer by remodeling the tumor microenvironment via regulation of GAB2/AKT/mTOR signaling pathway
Source: HighWire-hosted journal article supplement (doi:10.1136/jitc-2021-004113), 2022-05-01
Supplement: jitc-2021-004113supp003_data_supplement.xlsx [file jitc-2021-004113supp003_data_supplement.xlsx]

## Sheet: Oligo
Supplemental Table 3: Oligonucleotides used in this study.
gRNA primers	Sequence (5'→3')
human SNORA38B gRNA1-F	CACCGGGGCCAGCTTGCTCTCCGC
human SNORA38B gRNA1-R	AAACGCGGAGAGCAAGCTGGCCCC
human SNORA38B gRNA2-F	CACCGTGAGCCTGCGGAGAGCAAGC
human SNORA38B gRNA2-R	AAACGCTTGCTCTCCGCAGGCTCAC
human SNORA38B gRNA3-F	CACCGTGTCTATAGTTCCTTGTCTT
human SNORA38B gRNA3-R	AAACAAGACAAGGAACTATAGACAC
mouse SNORA38B gRNA1-F	CACCGTCGGAGGCAAAGAAACGTGG
mouse SNORA38B gRNA1-R	AAACCCACGTTTCTTTGCCTCCGAC
mouse SNORA38B gRNA2-F	CACCGCAAAGAAACGTGGTGGATT
mouse SNORA38B gRNA2-R	AAACAATCCACCACGTTTCTTTGC
mouse SNORA38B gRNA3-F	CACCGGTTGATTCTGAGCCTGCAG
mouse SNORA38B gRNA3-R	AAACCTGCAGGCTCAGAATCAACC
E2F1 gRNA1-F	CACCGACGGTGTCGTCGACCTGAAC
E2F1 gRNA1-R	AAACGTTCAGGTCGACGACACCGTC
E2F1 gRNA2-F	CACCGCGTCATCATCTCCGCCGCGC
E2F1 gRNA2-R	AAACGCGCGGCGGAGATGATGACGC
E2F1 gRNA3-F	CACCGGAGATGATGACGATCTGCG
E2F1 gRNA3-R	AAACCGCAGATCGTCATCATCTCC
GAB2 gRNA1-F	CACCGAATTCTGTATTGTGCCGGCT
GAB2 gRNA1-R	AAACAGCCGGCACAATACAGAATTC
GAB2 gRNA2-F	CACCGGCTCATCCGGCCACTCCGC
GAB2 gRNA2-R	AAACGCGGAGTGGCCGGATGAGCC
GAB2 gRNA3-F	CACCGCGACGTGGTGTGCACCGGC
GAB2 gRNA3-R	AAACGCCGGTGCACACCACGTCGC
Mouse model sequencing primers	Sequence (5'→3')
oIMR8543-TP53-F	GGTTAAACCCAGCTTGACCA
oIMR8544-TP53-R	CTGCATAGTACGCTATACCCTGT
22907-KRAS WT-F	TGTCTT TCCCCAGCACAGT
22908-KRAS COM-R	CTGCATAGTACGCTATACCCTGT
Oimr9592-KRAS MUT-F	GCAGGTCGAGGGACCTAATA
21557	GCA GTG GAG AAC TGT CAA AGC
oIMR7338	CTA GGC CAC AGA ATT GAA AGA TCT
oIMR7339	GTA GGT GGA AAT TCT AGC ATC ATC C
oIMR9377	ATG TTT AGC TGG CCC AAA TG
ChIP primers	Sequence (5'→3')
ChIP-GAB2-F	TGCTGCAGCTGCTCCCCCG
ChIP-GAB2-R	ATAGCGCCTCAACTTCTTCTCG
RT-qPCR primers	Sequence (5'→3')
SNORA38B-F	TTCCTTGTCTTTGGACATGTAAGA
SNORA38B-R	TGTGGGATGGTTGATCTTGA
E2F1-F	GGACCTGGAAACTGACCATCAG
E2F1-R	CAGTGAGGTCTCATAGCGTGAC
E2f1-F	GGATCTGGAGACTGACCATCAG
E2f1-R	GGTTTCATAGCGTGACTTCTCCC
hACTB-F	CACCATTGGCAATGAGCGGTTC
hACTB-R	AGGTCTTTGCGGATGTCCACGT
mACTB-F	CATTGCTGACAGGATGCAGAAGG
mACTB-R	TGCTGGAAGGTGGACAGTGAGG
GAB2-F	TCAGCAGAGACCGCCAATCAGT
GAB2-R	GGTACTCGTAGGTCTCACAGGA
Gab2-F	CAGCAAAGACCTCCAATCAGCG
Gab2-R	GGTACTCGTAGGTCTCACAGGA
hIL1β-F	CCACAGACCTTCCAGGAGAATG
hIL1β-R	GTGCAGTTCAGTGATCGTACAGG
mIL1β-F	TGGACCTTCCAGGATGAGGACA
mIL1β-R	GTTCATCTCGGAGCCTGTAGTG
hIL4-F	CCGTAACAGACATCTTTGCTGCC
hIL4-R	GAGTGTCCTTCTCATGGTGGCT
mIL4-F	ATCATCGGCATTTTGAACGAGGTC
mIL4-R	ACCTTGGAAGCCCTACAGACGA
hIL6-F	AGACAGCCACTCACCTCTTCAG
hIL6-R	TTCTGCCAGTGCCTCTTTGCTG
mIL6-F	TACCACTTCACAAGTCGGAGGC
mIL6-R	CTGCAAGTGCATCATCGTTGTTC
hIL2-F	AGAACTCAAACCTCTGGAGGAAG
hIL2-R	GCTGTCTCATCAGCATATTCACAC
mIL2-F	GCGGCATGTTCTGGATTTGACTC
mIL2-R	CCACCACAGTTGCTGACTCATC
hIL10-F	TCTCCGAGATGCCTTCAGCAGA
hIL10-R	TCAGACAAGGCTTGGCAACCCA
mIL10-F	CGGGAAGACAATAACTGCACCC
mIL10-R	CGGTTAGCAGTATGTTGTCCAGC
hIL13-F	ACGGTCATTGCTCTCACTTGCC
hIL13-R	CTGTCAGGTTGATGCTCCATACC
mIL13-F	AACGGCAGCATGGTATGGAGTG
mIL13-R	TGGGTCCTGTAGATGGCATTGC
hIL15-F	AACAGAAGCCAACTGGGTGAATG
hIL15-R	CTCCAAGAGAAAGCACTTCATTGC
mIL15-F	GTAGGTCTCCCTAAAACAGAGGC
mIL15-R	TCCAGGAGAAAGCAGTTCATTGC
hIL17-F	CGGACTGTGATGGTCAACCTGA
hIL17-R	GCACTTTGCCTCCCAGATCACA
mIL17-F	CAGACTACCTCAACCGTTCCAC
mIL17-R	TCCAGCTTTCCCTCCGCATTGA
hIL18-F	GATAGCCAGCCTAGAGGTATGG
hIL18-R	CCTTGATGTTATCAGGAGGATTCA
mIL18-F	GACAGCCTGTGTTCGAGGATATG
mIL18-R	TGTTCTTACAGGAGAGGGTAGAC
hTNFα-F	CTCTTCTGCCTGCTGCACTTTG
hTNFα-R	ATGGGCTACAGGCTTGTCACTC
mTNFα-F	GGTGCCTATGTCTCAGCCTCTT
mTNFα-R	GCCATAGAACTGATGAGAGGGAG
hTGFβ1-F	TACCTGAACCCGTGTTGCTCTC
hTGFβ1-R	GTTGCTGAGGTATCGCCAGGAA
mTGFβ1-F	TGATACGCCTGAGTGGCTGTCT
mTGFβ1-R	CACAAGAGCAGTGAGCGCTGAA
hCSF1-F	TGAGACACCTCTCCAGTTGCTG
hCSF1-R	GCAATCAGGCTTGGTCACCACA
mCSF1-F	TGGATGCCTGTGAATGGCTCTG
mCSF1-R	GTGGGTGTCATTCCAAACCTGC
h18S-F	CGGCTACCACATCCAAGGAA
h18S-R	GCTGGAATTACCGCGGCT
hU6-F	CTCGCTTCGGCAGCACA
hU6-R	AACGCTTCACGAATTTGCGT
Vector Construction Primers	Sequence (5'→3')
pGEM-3Z-h SNORA38B-F	GAATTCCCTCCTACAAAGGCATGTCT
pGEM-3Z-h SNORA38B-R	AAGCTTTTCTATGTGGGATGGTTGAT
h SNORA38B pENTR F	CACCCCTCCTACAAAGGCATGTCT
h SNORA38B pENTR R	TTCTATGTGGGATGGTTGAT
FISH probes	Sequence (5'→3')
human SNORA38B-oligo-1	cy3-CCTGCGGAGAGCAAGC
human SNORA38B-oligo-2	cy3-TGATCTTGAGCCTGCG
human SNORA38B-oligo-3	cy3-GTGGGATGGTTGATCT
human SNORA38B-oligo-4	cy3-CAAAGACAAGGAACTA
human SNORA38B-oligo-5	cy3-ACTATAGACATGCCTT
LNA	Sequence (5'→3')(*:phosphorothioated modification; +:LNA modification)
human SNORA38B-LNA-1	C*C*T*G*+C*G*+G*A*+G*A*+G*C*A*A*G*C*
human SNORA38B-LNA-2	T*G*A*T*+C*T*+T*G*+A*G*+C*C*T*G*C*G*
human SNORA38B-LNA-3	G*T*G*G*+G*A*+T*G*+G*T*+T*G*A*T*C*T*
human SNORA38B-LNA-4	C*A*A*A*+G*A*+C*A*+A*G*+G*A*A*C*T*A*
human SNORA38B-LNA-5	A*C*T*A*+T*A*+G*A*+C*A*+T*G*C*C*T*T*
mouse SNORA38B-LNA-1	A*G*C*C*+T*G*+C*A*+G*G*+G*G*G*C*A*A*
mouse SNORA38B-LNA-2	C*G*T*T*+T*C*+T*T*+T*G*+C*C*T*C*C*G*
mouse SNORA38B-LNA-3	T*C*C*A*+A*A*+T*C*+C*A*+C*C*A*C*G*T*
mouse SNORA38B-LNA-4	G*G*T*T*+G*A*+T*T*+C*T*+G*A*G*C*C*T*
mouse SNORA38B-LNA-5	C*A*G*A*+C*C*+T*T*+T*C*+C*A*A*A*T*C*
