# Supplementary material for: Targeting SNORA38B attenuates tumorigenesis and sensitizes immune checkpoint blockade in non-small cell lung cancer by remodeling the tumor microenvironment via regulation of GAB2/AKT/mTOR signaling pathway
Source: HighWire-hosted journal article supplement (doi:10.1136/jitc-2021-004113), 2022-05-01
Supplement: jitc-2021-004113supp004_data_supplement.xlsx [file jitc-2021-004113supp004_data_supplement.xlsx]

## Sheet: PBMC-KYN-cyTOF-2019-7-3 new rou
Supplemental Table 4: List of cyTOF antibodies used in this study.
CyTOF antibodies for mice
ID	TaggedAbs.description	Target	label	IntracellularStaining	clone	specificities	Source	cat
643	CD45(Ms) 89Y	CD45(Ms)	89Y	FALSE	30-F11	Ms	DVS-Fluidigm	3089005B
799	CD3e 152Sm (MDA)	CD3, CD3e	152Sm	FALSE	145-2C11	Ms	BioLegend	100302
889	CD8a(Ms) 146Nd (MDA)	CD8a	146Nd	FALSE	53-6.7	Ms	BioLegend	100702
758	Granzyme B 173Yb	Granzyme B	173Yb	TRUE	GB11	Hu, Ms	DVS-Fluidigm	3173006B
672	CD279(Ms) 171Yb (29F.1A12)	CD279, PD-1	171Yb	FALSE	29F.1A12	Ms	BioLegend	135202
648	CD4(Ms) 115In	CD4(Ms)	115In	FALSE	RM4-5	Ms	BioLegend	100506
525	p-STAT4 148Nd	p-STAT4(Y693)	148Nd	TRUE	38/p-Stat4	Hu, Ms	DVS-Fluidigm	3148006A
335	IFNg(Ms) 165Ho	IFNg	165Ho	TRUE	XMG1.2	Ms	DVS-Fluidigm	3165003B
882	T-bet 154Sm	T-bet	154Sm	TRUE	4B10	Hu, Ms	BioLegend	644825
879	GATA3 145Nd	GATA3	145Nd	TRUE	TWAJ	Hu, Ms, Pg, Rh	eBioscience	14-9966-82
800	CD25(Ms) 150Nd (MDA)	CD25	150Nd	FALSE	3C7	Ms	BioLegend	101902
365	Foxp3(Ms) 158Gd	Foxp3	158Gd	TRUE	FJK-16s	Ms, Rt, Bv, Cn, Po, Fe	DVS-Fluidigm	3158003A
550	LAP(Ms) 164Dy	LAP, TGF-b1	164Dy	TRUE	TW7-16B4	Ms	DVS-Fluidigm	3164014B
340	IL-17A(Ms) 174Yb	IL-17A	174Yb	TRUE	TC11-18H10.1	Ms	DVS-Fluidigm	3174002B
885	RORgt 163Dy	RORg(t)	163Dy	TRUE	B2D	Ms	eBioscience	14-6981-82
901	CD19(Ms) 149Sm (MDA)	CD19	149Sm	FALSE	4D5	Ms	BioLegend	115502
862	CD11c(Ms) 209Bi	CD11c	209Bi	FALSE	N418	Ms	DVS-Fluidigm	3209005B
805	NK1.1 170Er (MDA)	NK1.1	170Er	FALSE	PK136	Ms	BioLegend	108702
893	CD11b 139La	CD11b	139La	FALSE	M1/70	Ms, Hu	BioLegend	101249
653	F4/80(Ms) 159Tb (MDA)	F4/80	159Tb	FALSE	BM8	Ms	BioLegend	123102
604	Ly-6G/C 141Pr (MDA)	Ly-6G/Ly-6C, Gr-1	141Pr	FALSE	RB6-8C5	Ms	BioLegend	108402
786	CD86(Ms) 172Yb	CD86	172Yb	FALSE	GL1	Ms	DVS-Fluidigm	3172016B
730	iNOS(Ms) 161Dy	iNOS	161Dy	TRUE	CXNFT	Ms	DVS-Fluidigm	3161011B
732	CD206(Ms) 169Tm	CD206, MMR	169Tm	TRUE	C068C2	Ms	DVS-Fluidigm	3169021B
850	CX3CR1 176Yb	CX3CR1	176Yb	FALSE	SA011F11 SA011F11 SA011F11	Ms	BioLegend	149002
876	Arginase-1 166Er (MDA)	Arg-1, Arginase-1	166Er	TRUE	O94E6/ARG1	Hu, Ms	BioLegend	678802
763	TIM-3(Ms) 162Dy	TIM3, CD366	162Dy	FALSE	RMT3-23	Ms	DVS-Fluidigm	3162029B
557	Ki67 168Er (MDA)	Ki67	168Er	TRUE	B56	Ms, Hu	BD	556003
527	Vimentin 156Gd	Vimentin	156Gd	TRUE	RV202	Hu, Ms, Rb, Rt, cross	DVS-Fluidigm	3156023A
282	CD127(Ms) 175Lu	CD127, IL-7Ra (Ms)	175Lu	FALSE	A7R34	Ms	DVS-Fluidigm	3175006B
320	IL-2(Ms) 144Nd	IL-2	144Nd	TRUE	JES6-5H4	Ms	DVS-Fluidigm	3144002B
337	IL-6(Ms) 167Er	IL-6	167Er	TRUE	MP5-20F3	Ms	DVS-Fluidigm	3167003B
386	p-P38 160Gd	p-P38 MAPK	160Gd	TRUE	D3F9	Hu, Ms, Rt, Mk, Pg	CST	4511BF
